# Supplementary material for: The role of nitrogen and sulfur dual coordination of cobalt in Co-N4−xSx/C single atom catalysts in the oxygen reduction reaction
Source: Royal Society of Chemistry journal article supplement (doi:10.1039/d1se01654g), 2021-11-16
Supplement: d1se01654g1.pdf [file d1se01654g1.pdf]

## Supporting information

# The Role of Nitrogen and Sulfur Dual Coordination of Cobalt in Co-N<sub>4-x</sub>S<sub>x</sub>/C Single Atom Catalysts in Oxygen Reduction Reaction

Asnake Sahele Haile<sup>a</sup>, Heine Anton Hansen<sup>b,\*</sup>, Weldegebriel Yohannes<sup>c</sup>, and  
Yedilfana Setarge Mekonnen<sup>a,\*</sup>

<sup>a</sup>*Center for Environmental Science, College of Natural and Computational Sciences, Addis Ababa  
University, P.O. Box 1176, Addis Ababa, Ethiopia*

<sup>b</sup>*Department of Energy Conversion and Storage, Technical University of Denmark, Anker  
Engelunds Vej, 2800 Kgs. Lyngby (Denmark)*

<sup>c</sup>*Chemistry Department, College of Natural and Computational Sciences, Addis Ababa University,  
P.O. Box 1176, Addis Ababa, Ethiopia*

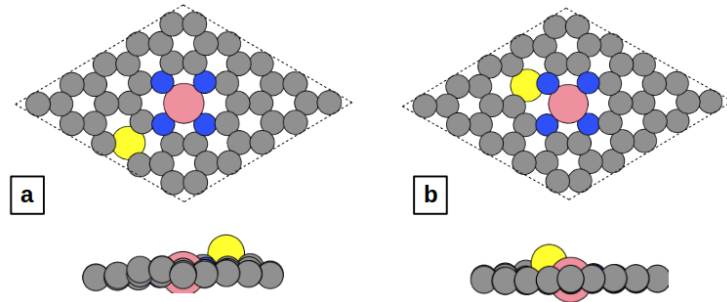

Figure S1: Top and side view of the structures of: a)  $\text{Co-N}_4\text{S-1/C}$  and b)  $\text{Co-N}_4\text{S-2/C}$ .

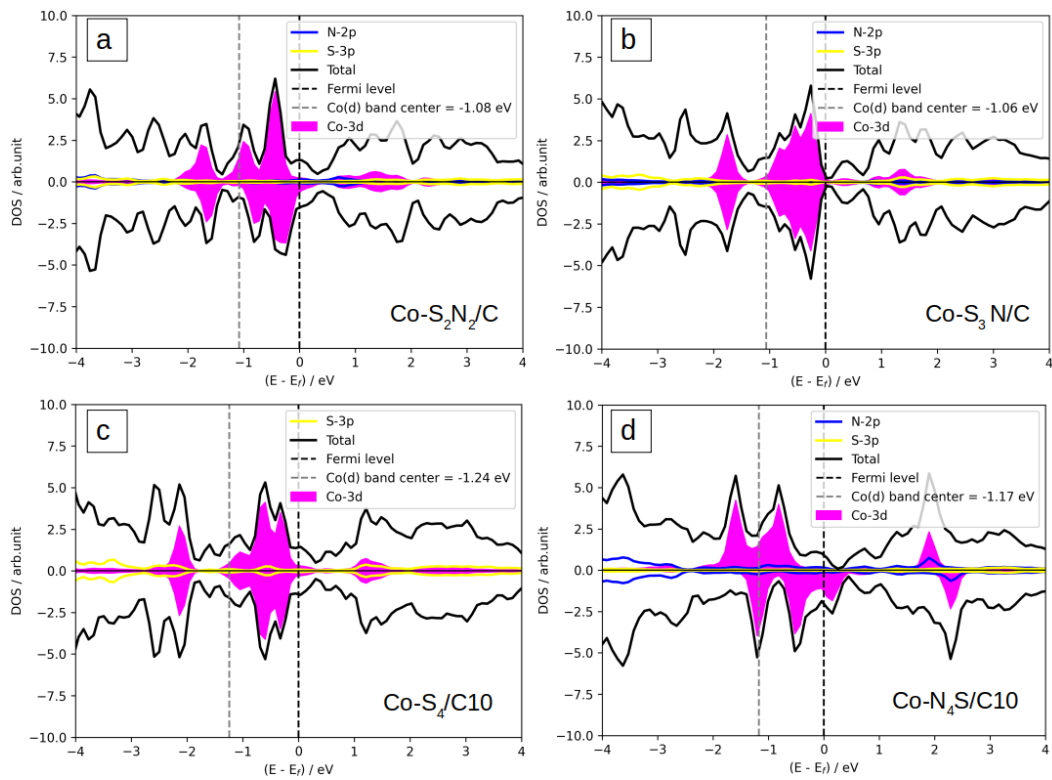

Figure S2: Partial density of states (PDOS) of Co, N, and S atom in: a)  $\text{Co-N}_2\text{S}_2/\text{C}$ , b)  $\text{Co-NS}_3/\text{C}$ , c)  $\text{Co-S}_4/\text{C}$  and d)  $\text{CoN}_4\text{S}/\text{C}$  systems.

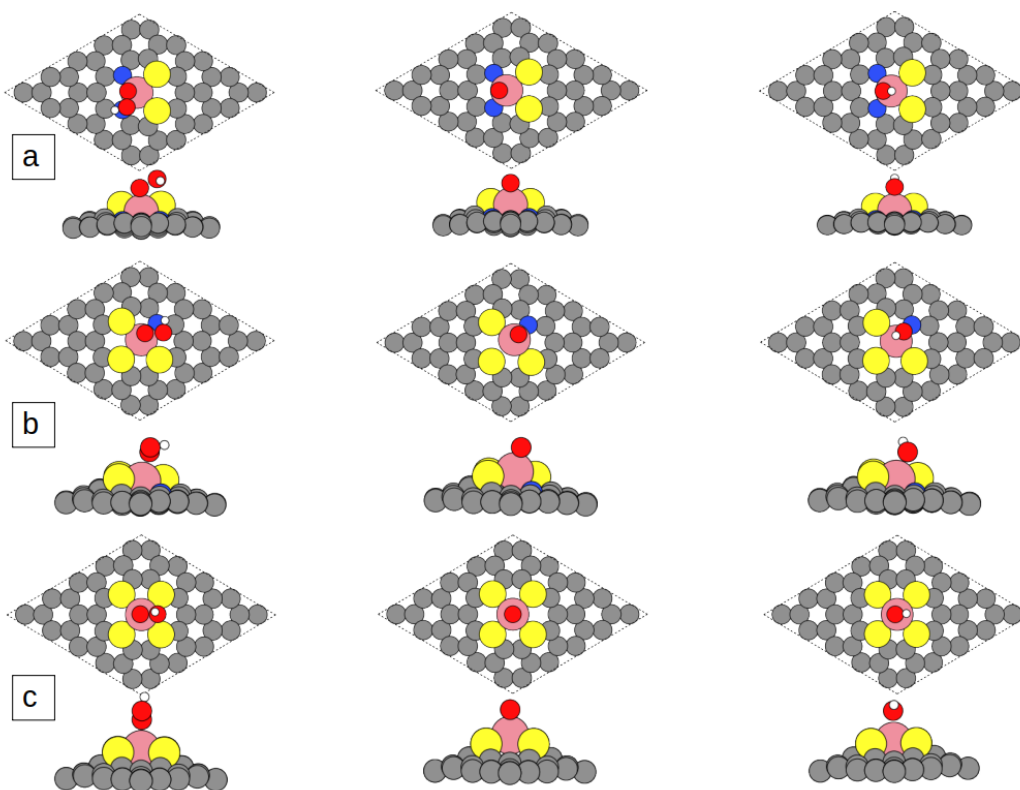

Figure S3: Optimized adsorption structures of ORR intermediates on: a) Co-N<sub>2</sub>S<sub>2</sub>/C, Co-NS<sub>3</sub>/C, and Co-S<sub>4</sub>/C. Pink, Cobalt (Co); blue, nitrogen (N); yellow, sulfur (S); gray, carbon (C); red, oxygen (O), and white, hydrogen (H).

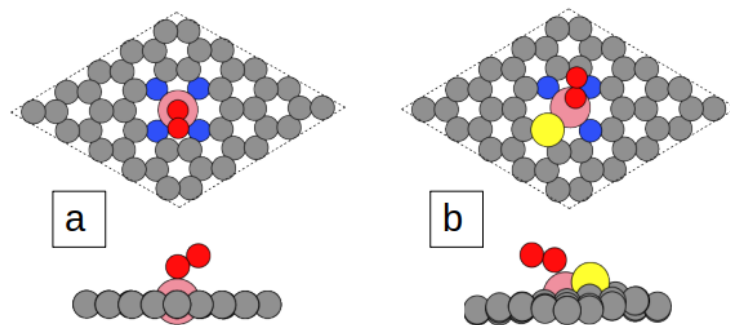

Figure S4: Optimized adsorption structures of  $O_2$  adsorbed on: a)  $Co-N_4S/C$  and b)  $Co-N_3S/C$

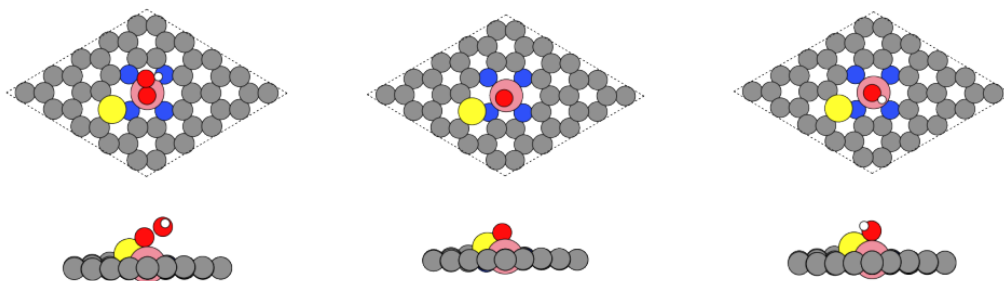

Figure S5: Optimized adsorption structures of ORR intermediates on  $Co-N_4S/C$

Table S1: The Bader charge of the atoms at the active sites of (a)  $Co-N_4/C$  and (b)  $Co-N_3S/C$ . The charge of N is the average charge of the existing N atoms.

| Adsorbate | Co- $N_4/C$ |       | Co- $N_3S/C$ |       |      |
|-----------|-------------|-------|--------------|-------|------|
|           | Co          | N     | Co           | N     | S    |
| *         | 0.9         | -1.21 | 0.72         | -1.21 | 0.18 |
| $O_2$     | 1.1         | -1.2  | 0.94         | -1.19 | 0.21 |
| *OOH      | 1.1         | -1.20 | 0.99         | -1.20 | 0.24 |
| *O        | 1.2         | -1.20 | 1.18         | -1.25 | 0.17 |
| *OH       | 1.1         | -1.20 | 1.02         | -1.20 | 0.18 |
| $H_2O$    | 1.0         | -1.20 | 0.70         | -1.16 | 0.17 |

Table S2: Zero point energy ( $E_{ZPE}$ ), entropy ( $-TS$ ) and enthalpy ( $H_{0 \rightarrow 298}$ ) contributions to the free energy and corrections specific to the BEEF-vdW functional (BEEF) for different adsorbates. The differences are calculated with  $H_2O(g)$  in equilibrium with  $H_2O(l)$  as reference.

| Adsorbate               | ZPE  | -TS   | $H_{0 \rightarrow 289K}$ | $\Delta E_{ZPE}$ | $-T\Delta S$ | BEEF  | $\Delta H$ | Total |
|-------------------------|------|-------|--------------------------|------------------|--------------|-------|------------|-------|
| $H_2O$                  | 0.56 | -0.67 | 0.103                    |                  |              |       |            |       |
| $H_2$                   | 0.27 | -0.40 | 0.088                    |                  |              |       |            |       |
| *O + $H_2$              | 0.33 | -0.48 | 0.128                    | -0.23            | 0.19         | 0.12  | 0.03       | 0.11  |
| *OOH + $\frac{3}{2}H_2$ | 0.82 | -0.80 | 0.224                    | -0.29            | 0.55         | 0.395 | 0.02       | 0.67  |
| *OH + $\frac{1}{2}H_2$  | 0.47 | -0.32 | 0.104                    | -0.09            | 0.36         | 0.075 | 0.001      | 0.34  |

Table S3: ORR intermediates adsorption Gibbs free energies at  $U = 0$  V<sub>RHE</sub> and the calculated ORR overpotential ( $\eta_{ORR}$ ) on the considered surfaces.

| Systems                             | $\Delta_{ads}G / eV$ |      |      | $\eta_{ORR} / V$ |
|-------------------------------------|----------------------|------|------|------------------|
|                                     | OOH*                 | O*   | OH*  |                  |
| Co-N <sub>4</sub> /C                | 3.79                 | 2.28 | 0.66 | 0.57             |
| Co-N <sub>3</sub> S/C               | 4.05                 | 2.16 | 0.86 | 0.37             |
| Co-N <sub>2</sub> S <sub>2</sub> /C | 4.07                 | 1.93 | 0.82 | 0.41             |
| Co-NS <sub>3</sub> /C10             | 4.09                 | 2.05 | 0.91 | 0.40             |
| Co-S <sub>4</sub> /C10              | 4.16                 | 2.28 | 0.97 | 0.47             |
| Co-N <sub>4</sub> S/C10             | 3.86                 | 2.23 | 0.72 | 0.51             |

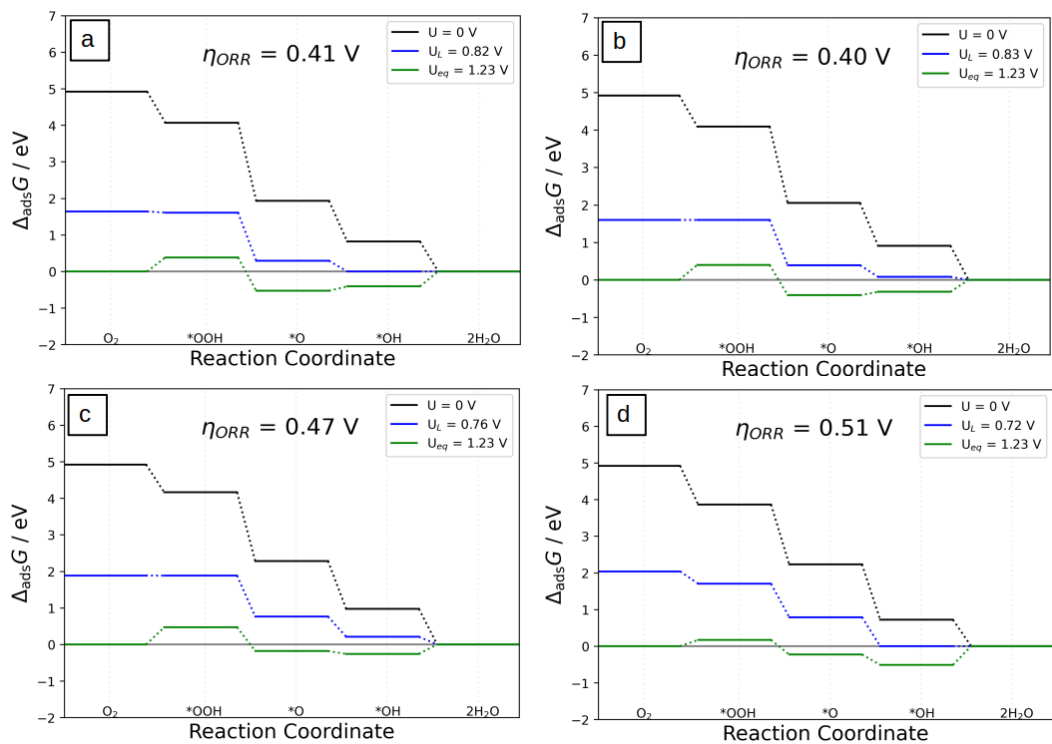

Figure S6: The free energy diagram of ORR on: a) Co-N<sub>2</sub>S<sub>2</sub>/C, b) Co-NS<sub>3</sub>/C, c) Co-S<sub>4</sub>/C, and d) Co-N<sub>4</sub>S/C
